# Supplementary material
Source: Royal Society of Chemistry journal article supplement (doi:10.1039/d5lc00876j)
Supplement: d5lc00876j2.xlsx [file d5lc00876j2.xlsx]

## Sheet: Sheet1
Paper	Sample Types	Processing Volume	Elution Volume	Application Domain	Automation Level	Duration of the extraction	DNA Quantitative Characterisation	cfDNA Recovery characterisation method	cfDNA Recovery (Caution with interpretration: Not for comparison unless same method used)	Benchmark choice and method	Comparison to benchmark (Caution with interpretration: Not for comparison unless same method used)
Yang et al. 2015	Plasma, Whole blood (patients with severe sepsis and healthy controls)	<10 μL droplet	Not specified	Sepsis, ICU mortality prognosis	Semi-automated	5 min	PicoGreen fluorescence labeling, Electrophoresis	Not available	n/a	Not mentioned	n/a
10.1039/C5LC00681C
Lab on a Chip
Kim et al. 2018	Whole blood (>3 mL), Plasma from NSCLC patients	>3 mL whole blood	Not specified	Cancer (non-small cell lung cancer), Cancer therapy monitoring	Fully automated	30 min	qPCR, Droplet digital PCR	Synthetic short DNA (300 base pairs) spiked into the human serum to mimic cfDNA, with the recovery rate quantified by real-time PCR. The concentration/amount spiked was not available	50-75%	Qiagen QIAamp DNA Blood Mini Kit (Q-BM) and QIAamp cfDNA Kit (Q-cfNDA) Synthetic short DNA (300 base pairs) spiked into the human serum to mimic cfDNA, with the recovery rate quantified by real-time PCR. The concentration/amount spiked was not available. Characterised with real-time qPCR	Similar performance
10.1039/C8LC00165K
Lab on a Chip
Kye et al. 2020	Synthetic cfDNA at a concentration of 50 ng/mL and 250 ng/mL in DEPC-DW with 4,000 ppm PEO (Sigma Aldrich, USA) at a concentration of 50 ng/mL and 250 ng/mL.	1 mL sample volume	50 μL	Cancer diagnostics, Cancer prognosis	Semi-automated	At max flowrate (150 μL/min) would equate to 6-7 min	PCR amplification, Gel electrophoresis	Not available	n/a	Not specified	n/a
10.1007/s13206-020-4208-1
BioChip Journal
Campos et al. 2018	Plasma from healthy donors, NSCLC patients, Colorectal cancer patients	Not clearly stated. Paper states ambition to process > 5mL	Not explicitly stated	Cancer (NSCLC, colorectal cancer), Oncology	Manual / Semi-automated (pre-processing of the plasma, which included digestion with proteinase K, the sample was mixed with the IB (1:3))	At max flowrate (2 μL/min), 1mL would take 8 hours 20 min	Qubit quantification, Ligase detection reaction (LDR) for KRAS mutations, qPCR	Method 1: Using a DNA ladder consisting of 50–700 bp double-stranded DNA fragments. DNA ladder was spiked into PBS (concentration not available) ( presumed then DNA measured with Tape station) Method 2: Spiked plasma from healthy donors with the 122 bp fragment bearing KRAS mutations. qPCR detection (spiked concentration/amount not available)	Method 1: >90% for 100-700bp; >70% for 50bp Method 2: 92% recovered	Benchmarks: Norgen and Qiagen cfDNA kits. Method: Using a DNA ladder consisting of 50–700 bp double-stranded DNA fragments. DNA ladder was spiked into PBS (concentration/amount not available)	Similar performance
10.1039/C8LC00716K
Lab on a Chip
Gwak et al. 2019	cfDNA-spiked PBS at 1 ng/ml, Serum from breast cancer patients and healthy controls, Whole blood	500 μL serum	50 μL	Cancer (breast cancer), Cancer diagnostics	Semi-automated	19 min	Qubit quantification, Real-time PCR, qPCR	cfDNA-spiked (IL2) PBS at 1 ng/ml characterised by qPCR	0.518	Benchmark: MagMAX Cell-Free DNA Isolation Kit (Applied Biosystems) - Should be noted that the figures on the paper state "Accugene" which is a different kit. Method: cfDNA-spiked (IL2) PBS at 1 ng/ml characterised by qPCR	Similar performance
10.1063/1.5100009
Biomicrofluidics
Lee et al. 2020	Plasma; Synthetic plasma with cfDNA reference standards	0.5-1 mL plasma	50-150 μL (adjustable)	Cancer (HER-2 breast cancer with liver metastasis), Cancer monitoring	Fully automated	15 min	ddPCR, NGS, qPCR	DNA extraction efficiency was calculated based on specific DNA recovery by comparing the absolute copy number of DNA detected in qPCR to the theoretically expected value assuming 100% DNA extraction efficiency. To measure the DNA recovery rate, the 180bp lambda DNA PCR product was spiked into the plasma of a healthy control. For comparison, the volumes of eluent and the plasma were fixed at 50μL …	70-80%	Benchmark: Qiagen QIAamp cfDNA. Method: The comparative extraction efficiency between QIAamp and PIBEX chip was investigated by Ct value calculation. In addition, the levels of the four genes in cfDNA healthy plasma samples (N=8) extracted by either QIAamp or PIBEX chip were compared. Real-time PCR characterisation.	Similar performance
10.1038/s41698-019-0107-0
npj Precision Oncology
Schneider et al. 2022	cfDNA in AcroMetrix EDTA Plasma Dilution Matrix	1 ml of AcroMetrix EDTA Plasma Dilution Matrix	10-50 μL typical	Prenatal diagnosis (NIPT), Prenatal screening	Semi-automated	20 min	Agilent Bioanalyzer	cfDNA eluate sample yield was performed using the Agilent Bioanalyzer 2100 Machine (Agilent Technologies). The Agilent DNA 1000 Kit and DNA Chip (Agilent Technologies) were used for On-Chip Electrophoresis, and the resulting electropherogram traces were analyzed to identify the DNA concentration (ng/μl) of 149-bp cfDNA input sample and the eluate to calculate the cfDNA yield. As small as 16.56 ng…	60-70%	Not mentioned	n/a
10.1002/pd.6092
Prenatal Diagnosis
Hu et al. 2019	Whole blood (4 mL)	4 mL whole blood 1.6 mL plasma	Not specified	Not specified (liquid biopsy applications)	Semi-automated	15 min	qPCR; Droplet digital PCR	T790 M mutation (varying degrees of mutation including 5%, 20%, and 50%) spiked in the whole blood in ctDNA isolated from whole blood samples. low concentration samples (101–104 copies). High concentration samples (104–107). Quantified by ddPCR.	30-65%	Benchmark: MagMAX Cell-Free Total Nucleic Acid Kit. Method: T790 M mutation (varying degrees of mutation including 5%, 20%, and 50%) spiked in the whole blood in ctDNA isolated from whole blood samples. low concentration samples (101–104 copies). High concentration samples (104–107). Quantified by ddPCR.	Similar performance
10.1039/C9AN00493A
Analyst
Jin et al. 2018	Spiked buffer, 14 samples from prospective CRC patients, and 10 from healthy controls	500 μL plasma samples	Not specified	Cancer (colorectal cancer), KRAS and BRAF mutation detection	Semi-automated	20 min	qPCR	200 µL of the ALU gene (247 bp amplicon) was mixed with 100 µL of DTBP (100 mg/mL) and then was injected into the platform. PCR (only Cycle Numbers provided) for Actin Gene	1 Ct cycle difference between input and chip eluate could be cautiously interpreted as 50% recovery	Benchmark: Qiagen QIAamp cfDNA Kit . Method: Characterised on plasma samples with non calibrated non quantitative PCR (only Cycle Numbers provided) for Actin Gene. Unclear wether on same volumes and biological replicates	Information in the paper is conflicting and no statistical analysis provided
10.1002/advs.201800614
Advanced Science
This paper	Plasma from healthy donors (400 samples) and hospital patients with suspected sepsis (9 patients)	1-4 mL plasma	50 μL	Sepsis, Pathogen identification	Fully automated	40 min	qPCR, mNGS	Identical healthy human plasma samples processed in same volume on the benchmark manual extraction and microfluidic device. qPCR on LINE sequence. Recovery expressed as percentage relative to benchmark amount	Relative recovery to benchmark is 100% ( averaged over 333 samples)	Benchmark: Qiagen QIAamp cfDNA kit. Method:Characterised with quantitative PCR on LINE sequence on matched 1-4mL plasma samples (biological replicates N=458, considered for statistics N=333).	Similar performance
